# Supplementary material for: Automatic Classification of Artifactual ICA-Components for Artifact Removal in EEG Signals
Source: Springer Nature journal article supplement (doi:10.1186/1744-9081-7-30), 2011-01-01

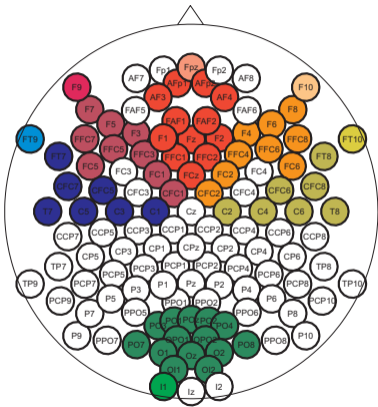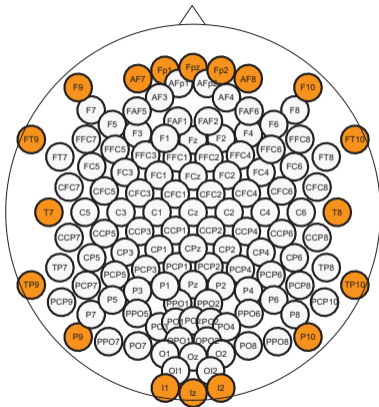

Supplement: 12993_2011_353_MOESM8_ESM.pdf [file 12993_2011_353_MOESM8_ESM.pdf]
