# Supplementary figures and images for: Automatic Classification of Artifactual ICA-Components for Artifact Removal in EEG Signals
Source: Springer Nature journal article supplement (doi:10.1186/1744-9081-7-30), 2011-01-01

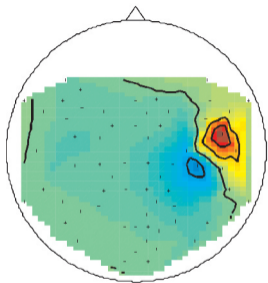

Pattern

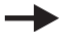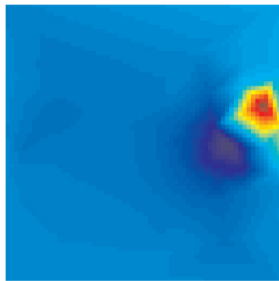

Pattern Matrix

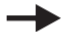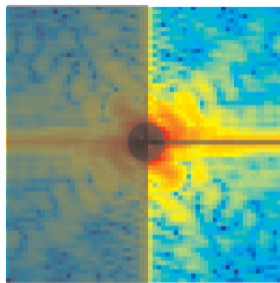

2D Spectrum

Supplement: 12993_2011_353_MOESM7_ESM.pdf [file 12993_2011_353_MOESM7_ESM.pdf]
